# Supplementary material for: An Empirical Examination of Aging’s Ramifications on Large-scale Agriculture: China’s Perspective
Source: publisher site journal article supplement (doi:10.1515/econ-2022-0094), 2024-01-01
Supplement: Supplementary file 1 [file Reviews.pdf]

# Reviews of ECONJOURNAL-D-24-00026R2

An Empirical Examination of Aging's Ramifications on Large-scale Agriculture: China's Perspective

## Round 1

### Reviewer 1

This proposed work utilizes data from China's Third National Agricultural Census and employs measurements of aging at both the rural household and county-city dimensions.

The analysis includes an examination of the moderating effects of per capita arable land area and the level of mechanization on the impact of aging on large-scale agriculture. However

some suggestion to improve the article

- 1] More recent reference needed
- 2] Explain How to identify the control variable
- 3] In 3.3 logit model or logistic model
- 4] Some comparison needed
- 5] More discussion needed
- 6] Rewrite the conclusion part as per the results.

Transfer Authorization

### Reviewer 2

The paper conducts an in-depth study on the impact of aging on cooperative agriculture, providing compelling evidence from China. Additionally, it offers a beneficial analysis of the effects of aging on cooperative agriculture, providing profound insights for readers. Overall, the content and methodology of the paper are relatively comprehensive. However, there are concerns and suggestions to strengthen the manuscript:

Firstly, in the methodology section of the paper, a more detailed description of the research design and data collection methods is needed to ensure the credibility of the study. Where does this paper differ from the methods and models used in other studies in the field? This is a crucial basis for the adoption of current methods, and this aspect should be strengthened. Additionally, the selection process for the sample and the statistical methods used in the study need clearer explanations to enhance readers' understanding of the scientific rigor and reliability of the research.

Secondly, can the data be updated? The data cited in this paper is from the microdata of the "2016 Third National Agricultural Census." Are there more comprehensive and updated data available for potential updates? It is well-

known that rural areas in China have undergone certain changes in their economic landscape in recent years, especially under the impact of projects such as poverty alleviation. Updating the data would undoubtedly significantly enhance the persuasiveness of this paper.

Finally, the policy recommendations section appears somewhat thin. This part of the content should be expanded, addressing the significant regional disparities in China's agricultural economy. Additionally, is China's experience more widely applicable in the Third World? This would be beneficial for global agricultural development, considering that aging is a global challenge.

Add some more recent year references and future progress on paper

### Reviewer 3

The paper may be published with some necessary arrangements. These are explained as follows:

1. The importance of the results of the study should be stated in the abstract.
2. The words in the keywords section must be included in the abstract.
3. Organize the references in chronological order "(Hu et al., 2012; Zhong et al., 2008; Li et al., 2009)"
4. It is necessary to increase the literature support in the introduction.
5. It should be specified what kind of pre-processing the data was subjected to before modelling. Are there any missing data in the data set? If so, it can be explained how this missing data is handled in the study. How categorical data are included in the model? Data pre-processing and applications steps should be described in detail.
6. The methodological structure of the logit model should be briefly mentioned.
7. The result display in the tables should be reorganised to make it easier to follow and read. Variables can be described by their abbreviations in the tables and related sentences.
8. The conclusion section lacks some perspectives for possible further analyses.
9. What are the tangible benefits of this study?

## Reviewer 4

The authors have written the articles meticulously and should be accepted. They followed a good structure for the article. The model and methodology were well explained. The explanation of the result had good theoretical and empirical support. Therefore, I recommend this paper for recommendation.

## Round 2

### Reviewer 1

current form of the paper is ok

### Reviewer 2

All my previous comments have been incorporated in the revised version.

### Reviewer 3

The manuscript can be considered for publication in this version since the stated corrections were made.

## Editor

Overall this paper makes an important contribution by analyzing the impact of population aging on large-scale agriculture in China using a rigorous empirical approach. The topic is highly relevant given the challenges of an aging population for the agricultural sector in China and other developing countries undergoing similar demographic transitions.

The literature review provides a comprehensive survey of existing studies on the effects of aging on various aspects of agricultural production and land use. However, it could be strengthened by including more recent references to ensure timely coverage of this evolving topic.

The methodology is clearly explained overall. Some areas could use more detail, such as describing the process of sample selection from the agricultural census data and exactly how categorical variables are incorporated into the models. Clarifying the statistical approaches used will further strengthen the credibility of the analysis.

The results are presented clearly in tables but could be better organized for readability. Using abbreviations for variables where they repeat would make the tables more concise.

The discussion and policy conclusions appropriately synthesize the findings.

However, more could be said about avenues for future research, such as analyzing the dynamics of population aging over time using panel data approaches.

Some minor revisions:

Ensure consistency between keywords listed and those actually analyzed

Re-order references chronologically

Add missing data handling details

## Round 3

### Editor

All the comments proposed in the previous round are well addressed, therefore, I suggest the paper be accepted in the present form.
